# Supplementary material
Source: PubMed Central journal article supplement (PMC3598568)
Supplement: NIHMS377165-supplement-1.pdf [file NIHMS377165-supplement-1.pdf]

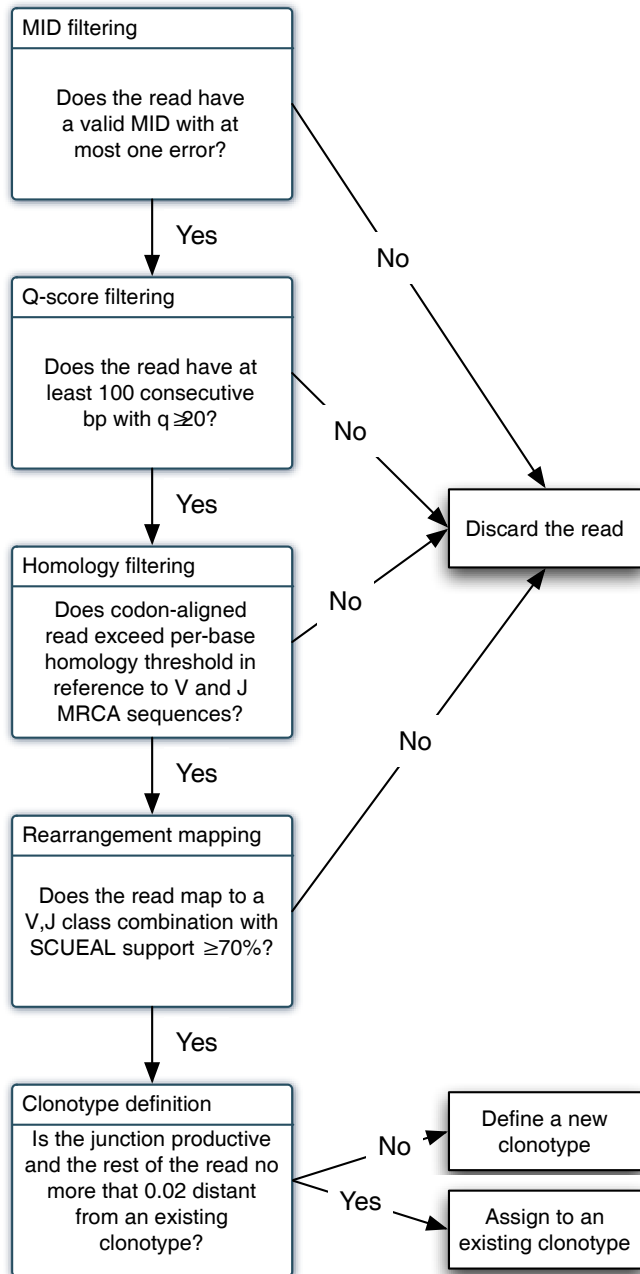

**Supplemental Figure 1. Flowchart of bioinformatics analysis of deep sequencing data from splenic V $\kappa$  libraries.** By this process, reads are assigned to V $\kappa$  gene and subgroup, and J usage, then the junction diversity is assessed and reads are assigned to unique clonotypic sets.
