# Supplementary material
Source: PubMed Central journal article supplement (PMC3598568)
Supplement: NIHMS377165-supplement-2.pdf [file NIHMS377165-supplement-2.pdf]

## **Supplemental Figure 2. Visualization of V $\kappa$ clonotype diversity**

Maximum likelihood phylogenetic trees representing clonotype diversity for control treated mouse (Library 4) and a PpL treated mouse (Library 8). **A.** Clonal diversity in the V $\kappa$ 3 subgroup **B.** Clonal diversity in the V $\kappa$ 6 subgroup. Each leaf corresponds to a single inferred clonotype. The shape of the pictogram labeling each leaf determines the J allele in the rearrangement: circle for J1, square for J2, triangle for J4 and diamond for J5. The color of the pictogram encodes the individual germline allele from the corresponding family that was present in the rearrangement. The size and numeric label of each leaf reflects how many transcripts were assigned to the individual clonotype. The amino-acid sequence for the CDR3 region of each clonotype is shown on the right.
