# Supplementary material
Source: PubMed Central journal article supplement (PMC3598568)
Supplement: NIHMS377165-supplement-3.pdf [file NIHMS377165-supplement-3.pdf]

**SUPPLEMENTAL TABLE I: Oligonucleotides used to generate V<sub>k</sub> amplicon libraries**

| <b>Primer</b>         | <b>Application</b>                                       | <b>MID</b> | <b>Sequence 5' to 3'</b>                                    |
|-----------------------|----------------------------------------------------------|------------|-------------------------------------------------------------|
| Rev_CK_cDNA           | 1st strand cDNA synthesis                                | MID1-8     | CTC ATT CCT GTT GAA GCT CTT GAC                             |
| Frwd_dT anchor primer | amplification of 5' poly A tailed cDNA                   | MID1-8     | GACCACGCGTATCGATGTCGACTTTTTTTTTTTTTTTTTT                    |
| Primer 3: Rev_CK_amp  | nested primer for amplification of 5' poly A tailed cDNA | MID1-8     | GGATACAGTTGGTGCAGCATC                                       |
| MID1_fwrd             | final PCR step, adding MID tags and primer A key         | MID1       | CGTATCGCCTCCCTCGCGCCATCAGACGAGTGCGTGACCACGCGTATCGATGTCGAC   |
| MID2_fwrd             | final PCR step, adding MID tags and primer A key         | MID2       | CGTATCGCCTCCCTCGCGCCATCAGACGCTCGACAGACCACGCGTATCGATGTCGAC   |
| MID3_fwrd             | final PCR step, adding MID tags and primer A key         | MID3       | CGTATCGCCTCCCTCGCGCCATCAGAGACGCACTCGACCACGCGTATCGATGTCGAC   |
| MID4_fwrd             | final PCR step, adding MID tags and primer A key         | MID4       | CGTATCGCCTCCCTCGCGCCATCAG AGCACTGTAG GACCACGCGTATCGATGTCGAC |
| MID5_fwrd             | final PCR step, adding MID tags and primer A key         | MID5       | CGTATCGCCTCCCTCGCGCCATCAG ATCAGACACGGACCACGCGTATCGATGTCGAC  |
| MID6_fwrd             | final PCR step, adding MID tags and primer A key         | MID6       | CGTATCGCCTCCCTCGCGCCATCAG ATATCGCGAGGACCACGCGTATCGATGTCGAC  |
| MID7_fwrd             | final PCR step, adding MID tags and primer A key         | MID7       | CGTATCGCCTCCCTCGCGCCATCAG CGTGTCTCTA GACCACGCGTATCGATGTCGAC |
| MID8_fwrd             | final PCR step, adding MID tags and primer A key         | MID8       | CGTATCGCCTCCCTCGCGCCATCAG CTCGCGTGTC GACCACGCGTATCGATGTCGAC |
| MID1_rev              | final PCR step, adding MID tags and primer B key         | MID1       | CTATGCGCCTTGCCAGCCCGCTCAGACGAGTGCGT GGATACAGTTGGTGCAGCATC   |
| MID2_rev              | final PCR step, adding MID tags and primer B key         | MID2       | CTATGCGCCTTGCCAGCCCGCTCAGACGCTCGACA GGATACAGTTGGTGCAGCATC   |
| MID3_rev              | final PCR step, adding MID tags and primer B key         | MID3       | CTATGCGCCTTGCCAGCCCGCTCAGAGACGCACTC GGATACAGTTGGTGCAGCATC   |
| MID4_rev              | final PCR step, adding MID tags and primer B key         | MID4       | CTATGCGCCTTGCCAGCCCGCTCAG AGCACTGTAG GGATACAGTTGGTGCAGCATC  |
| MID5_rev              | final PCR step, adding MID tags and primer B key         | MID5       | CTATGCGCCTTGCCAGCCCGCTCAG ATCAGACACG GGATACAGTTGGTGCAGCATC  |
| MID6_rev              | final PCR step, adding MID tags and primer B key         | MID6       | CTATGCGCCTTGCCAGCCCGCTCAG ATATCGCGAG GGATACAGTTGGTGCAGCATC  |
| MID7_rev              | final PCR step, adding MID tags and primer B key         | MID7       | CTATGCGCCTTGCCAGCCCGCTCAG CGTGTCTCTA GGATACAGTTGGTGCAGCATC  |
| MID8_rev              | final PCR step, adding MID tags and primer B key         | MID8       | CTATGCGCCTTGCCAGCCCGCTCAG CTCGCGTGTC GGATACAGTTGGTGCAGCATC  |
