# Supplementary material
Source: PubMed Central journal article supplement (PMC3598568)
Supplement: NIHMS377165-supplement-4.pdf [file NIHMS377165-supplement-4.pdf]

**Supplemental Table II. Vk subgroup assignments for transcripts**

| % Vk transcripts assigned to subgroup <sup>a</sup> : | CONTROL TREATED MICE |             |             |             |                 | PpL TREATED MICE |             |             |             |                  | p-value (two tailed t-test) <sup>b</sup> |  |
|------------------------------------------------------|----------------------|-------------|-------------|-------------|-----------------|------------------|-------------|-------------|-------------|------------------|------------------------------------------|--|
|                                                      | 1                    | 2           | 3           | 4           | Mean (±SD)      | 5                | 6           | 7           | 8           | Mean (±SD)       |                                          |  |
| <u>With conserved PpL motif</u>                      |                      |             |             |             |                 |                  |             |             |             |                  |                                          |  |
| Vk3                                                  | 9.7                  | 7.4         | 11.0        | 10.0        | 9.5±1.5         | 0.6              | 6.0         | 6.5         | 0.5         | 3.4±3.3          | <b>0.03</b>                              |  |
| Vk5                                                  | 5.0                  | 1.9         | 3.7         | 1.7         | 3.1±1.9         | 0.3              | 7.6         | 0.6         | 2.4         | 2.7±3.4          | 0.86                                     |  |
| Vk8                                                  | 7.9                  | 12.5        | 10.5        | 10.7        | 10.4±1.9        | 2.3              | 2.6         | 5.5         | 4.8         | 3.8±1.6          | <b>0.003</b>                             |  |
| Vk9                                                  | 3.4                  | 4.8         | 3.0         | 4.1         | 3.8±0.8         | 0.2              | 0.8         | 2.8         | 0.4         | 1.1±1.2          | <b>0.01</b>                              |  |
| Vk12                                                 | 17.5                 | 11.8        | 5.5         | 10.3        | 11.3±4.9        | 1.5              | 2.3         | 16.6        | 1.7         | 5.5±7.4          | 0.25                                     |  |
| Vk14                                                 | 5.6                  | 5.2         | 5.2         | 3.6         | 4.9±0.9         | 2.5              | 1.0         | 0.9         | 2.6         | 1.8±0.9          | <b>0.004</b>                             |  |
| Vk19                                                 | 1.1                  | 0.4         | 1.1         | 3.5         | 1.5±1.4         | 0.5              | 0.1         | 0.5         | 0.04        | 0.3±0.2          | 0.17                                     |  |
| Total % conserved PpL                                | <b>50.2</b>          | <b>44.0</b> | <b>40.0</b> | <b>43.9</b> | <b>44.5±4.2</b> | <b>7.9</b>       | <b>20.4</b> | <b>33.4</b> | <b>7.9</b>  | <b>18.5±11.2</b> | <b>0.02</b>                              |  |
| <u>Without conserved PpL motif</u>                   |                      |             |             |             |                 |                  |             |             |             |                  |                                          |  |
| Vk1                                                  | 13.5                 | 20.7        | 8.6         | 15.5        | 14.6±5          | 58.6             | 23.6        | 21.9        | 27.8        | 33.0±17.3        | 0.13                                     |  |
| Vk2                                                  | 2.0                  | 2.3         | 8.2         | 1.8         | 3.6± 3.1        | 6.0              | 9.7         | 3.1         | 10.2        | 7.2±3.3          | 0.17                                     |  |
| Vk4                                                  | 14.2                 | 10.7        | 12.7        | 11.0        | 12.2±1.6        | 6.0              | 18.1        | 15.5        | 18.4        | 14.5±5.8         | 0.49                                     |  |
| Vk6                                                  | 6.4                  | 12.7        | 22.2        | 15.0        | 14.1±6.5        | 13.3             | 23.6        | 20.6        | 24.0        | 20.4±5.0         | 0.18                                     |  |
| Vk7                                                  | 0.1                  | 0.09        | 0.8         | 0.2         | 0.3±0.3         | 0.2              | 0.01        | 0.0         | 0.2         | 0.1±0.1          | 0.35                                     |  |
| Vk10                                                 | 3.0                  | 2.6         | 3.2         | 4.7         | 3.4±0.9         | 6.5              | 3.0         | 3.5         | 5.1         | 4.5±1.6          | 0.28                                     |  |
| Vk11                                                 | 0.1                  | 0.01        | 0.02        | 0.0         | 0.03±0.05       | 0.5              | 0.1         | 0.03        | 0.04        | 0.2±0.2          | 0.32                                     |  |
| Vk13                                                 | 0.3                  | 0.1         | 0.4         | 0.1         | 0.2±0.2         | 0.5              | 0.5         | 0.4         | 0.5         | 0.5±0.1          | <b>0.05</b>                              |  |
| Vk15                                                 | 1.2                  | 4.0         | 2.7         | 4.7         | 3.2±1.5         | 0.3              | 0.2         | 1.0         | 0.2         | 0.4±0.4          | <b>0.04</b>                              |  |
| Vk16                                                 | 0.5                  | 1.0         | 0.3         | 2.0         | 1±0.8           | 0.0              | 0.3         | 0.3         | 0.6         | 0.3±0.2          | 0.20                                     |  |
| Vk17                                                 | 8.4                  | 1.6         | 0.9         | 0.9         | 3±3.6           | 0.5              | 0.4         | 0.2         | 0.2         | 0.3±0.2          | 0.25                                     |  |
| Vk18                                                 | 0.03                 | 0.02        | 0.01        | 0.08        | 0.04±0.03       | 0.0              | 0.0         | 0.0         | 0.0         | 0.0              | -                                        |  |
| Vk20                                                 | 0.01                 | 0           | 0.005       | 0.0         | 0.004±0.005     | 0.0              | 0.0         | 0.02        | 0.0         | 0.005±0.01       | 0.83                                     |  |
| Total % without a PpL motif                          | <b>49.7</b>          | <b>55.8</b> | <b>59.9</b> | <b>56.0</b> | <b>55.4±4.2</b> | <b>92.4</b>      | <b>79.5</b> | <b>66.5</b> | <b>87.2</b> | <b>81.4±11.3</b> | <b>0.02</b>                              |  |
| Total Vk assigned transcripts:                       | 13766                | 15527       | 23425       | 3979        |                 | 649              | 15146       | 6645        | 5634        |                  |                                          |  |

<sup>a</sup> Results from analysis of 454 sequencing of four libraries from four control-treated mice (Library 1-4) and four libraries from four PpL-treated mice (Library 5-8). Results are presented as % transcripts assigned to a Vκ subgroup.

<sup>b</sup> The two groups were compared by two-tailed Welch's t-test assuming unequal variances.
